# Supplementary material for: Effects of Speaker Emotional Facial Expression and Listener Age on Incremental Sentence Processing
Source: PLOS journal article supplement (doi:10.1371/journal.pone.0072559), 2013-09-06
Supplement: S1 (10.1371/journal.pone.0072559.s001) [file journal.pone.0072559.s001]

Image files (negative, neutral, positive) of the two faces associated with the experimental sentences, with mean rating and *SD* scored in norming study ( $N=15$ ); rating scale: 1= very negative, 9 = very positive.

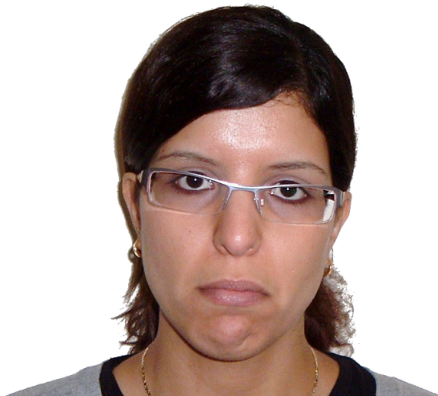

2.94 (1.00)

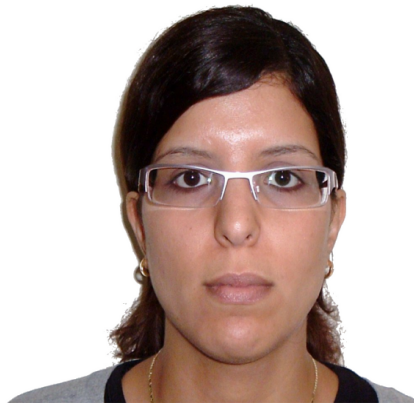

4.78 (1.00)

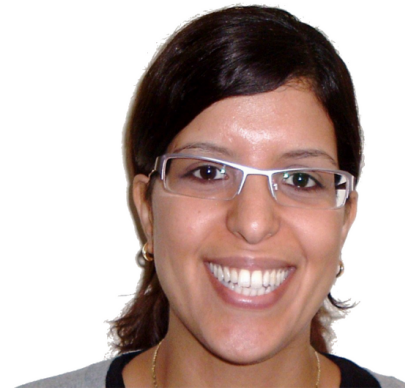

8.39 (.98)

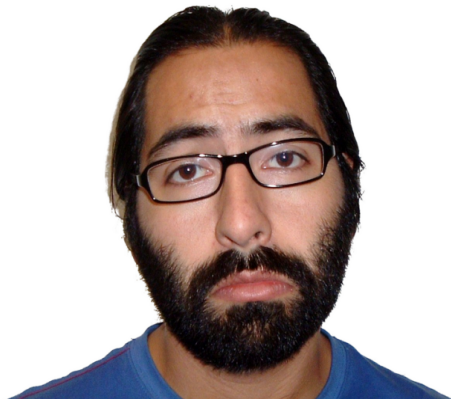

2.89 (1.18)

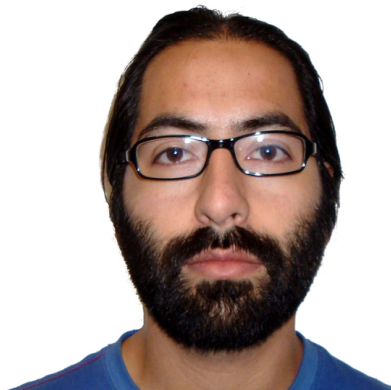

4.39 (.92)

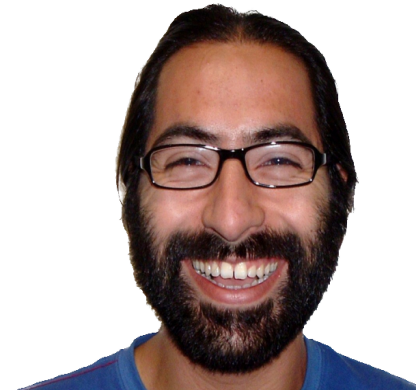

8.28 (.98)
